# Supplementary material
Source: PubMed Central journal article supplement (PMC7439711)
Supplement: 12916_2020_1687_MOESM5_ESM.pdf [file 12916_2020_1687_MOESM5_ESM.pdf]

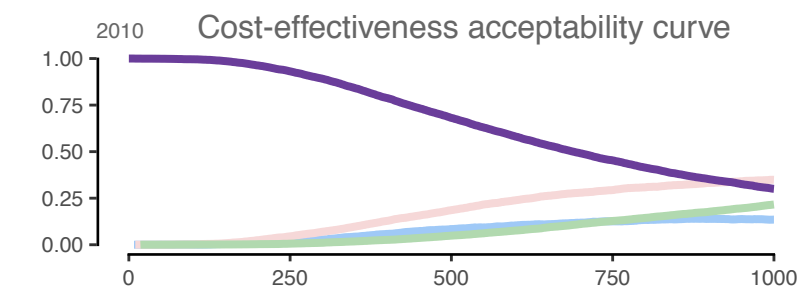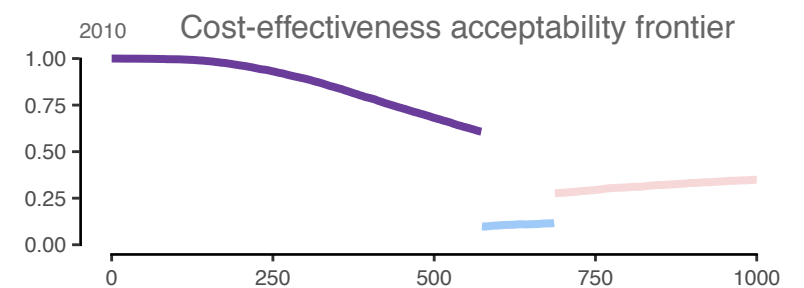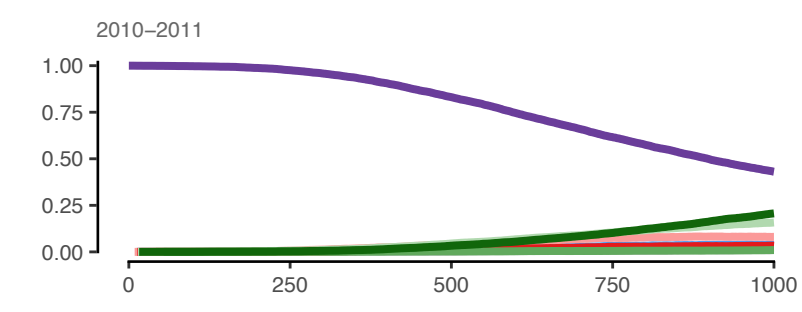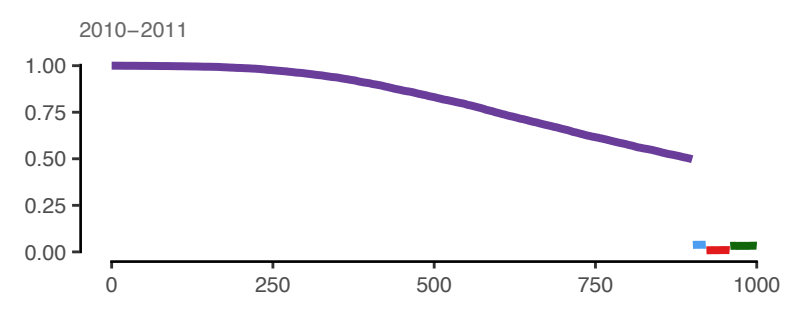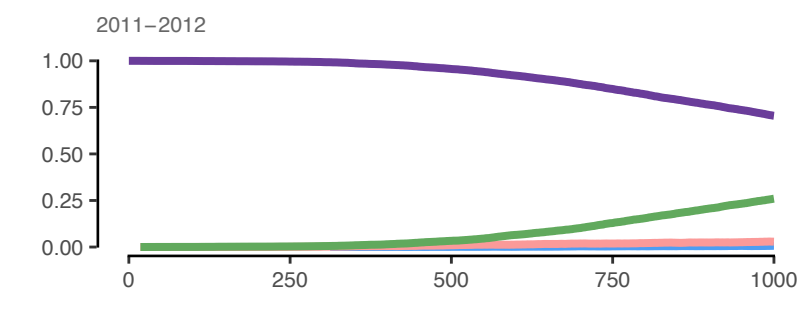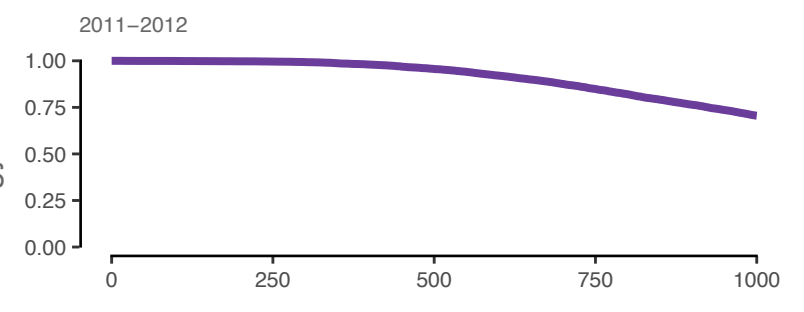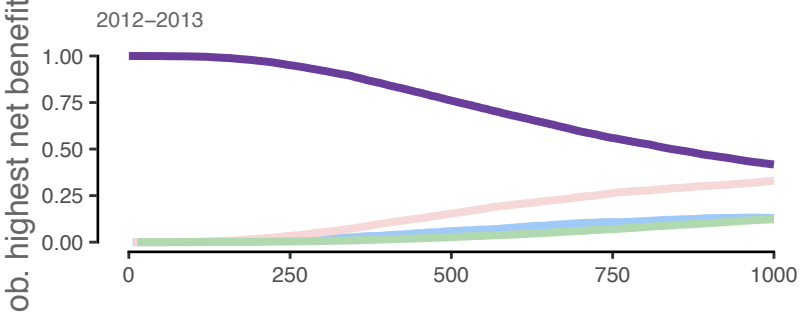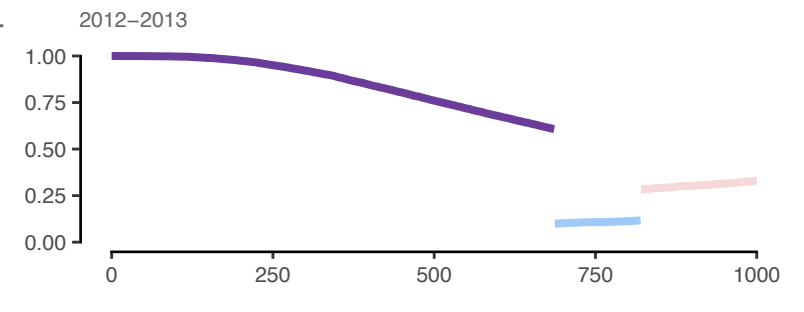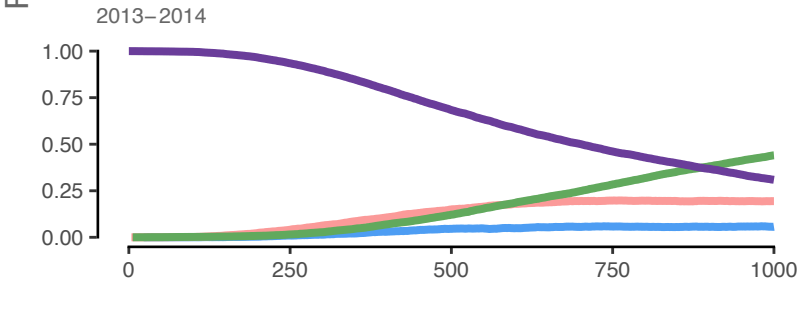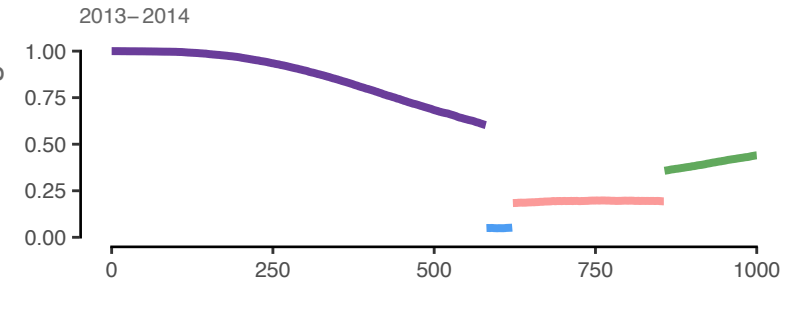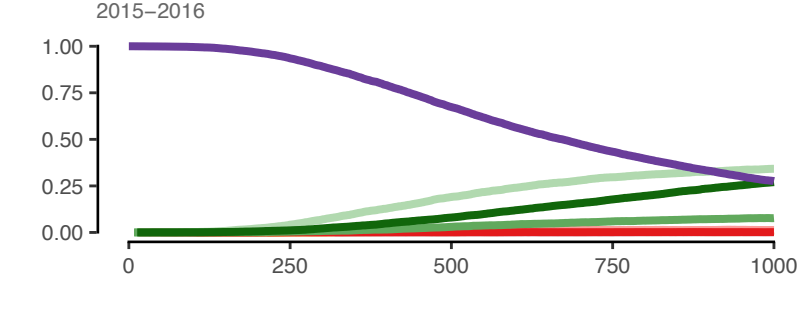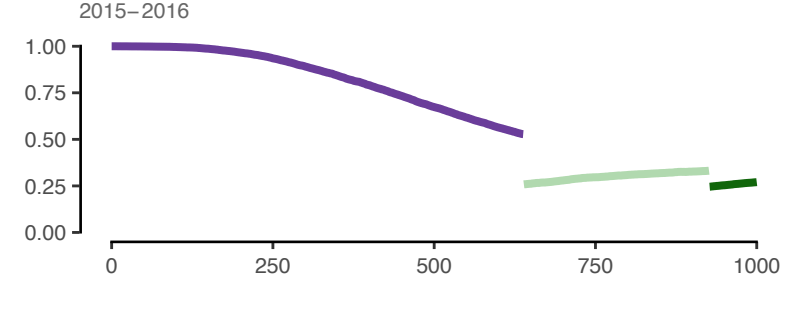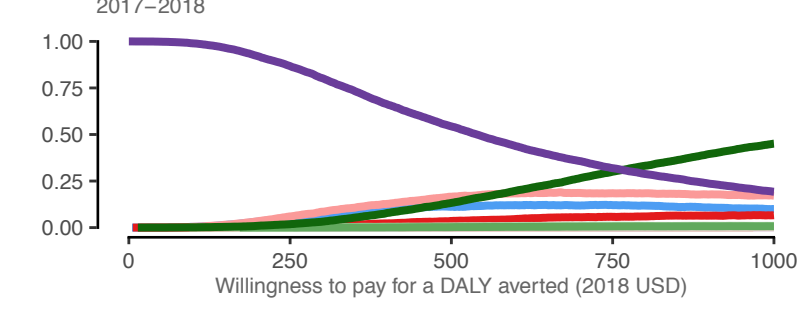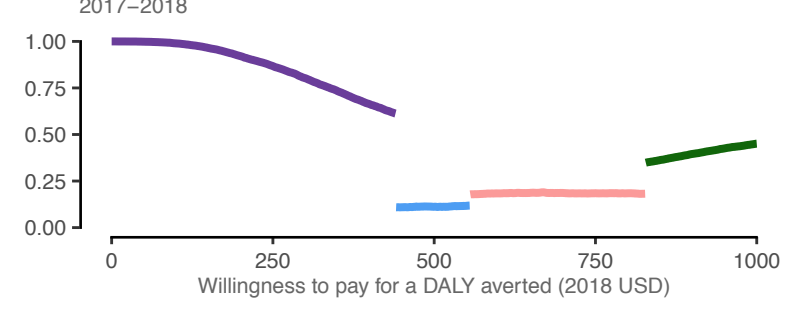

- Strategy
- Strategy IA
  - Strategy IB
  - Strategy IC
  - Strategy IIA
  - Strategy IIB
  - Strategy IIC
  - Strategy IIIA
  - Strategy IIIB
  - Strategy IIIC
  - No vaccine
